# Supplementary material for: OX40 expression enhances the prognostic significance of CD8 positive lymphocyte infiltration in colorectal cancer
Source: PubMed Central journal article supplement (PMC4741950; doi:10.18632/oncotarget.5940), 2015-09-29
Supplement: oncotarget-06-37588-s001.pdf [file oncotarget-06-37588-s001.pdf]

# OX40 expression enhances the prognostic significance of CD8 positive lymphocyte infiltration in colorectal cancer

## Supplementary Material

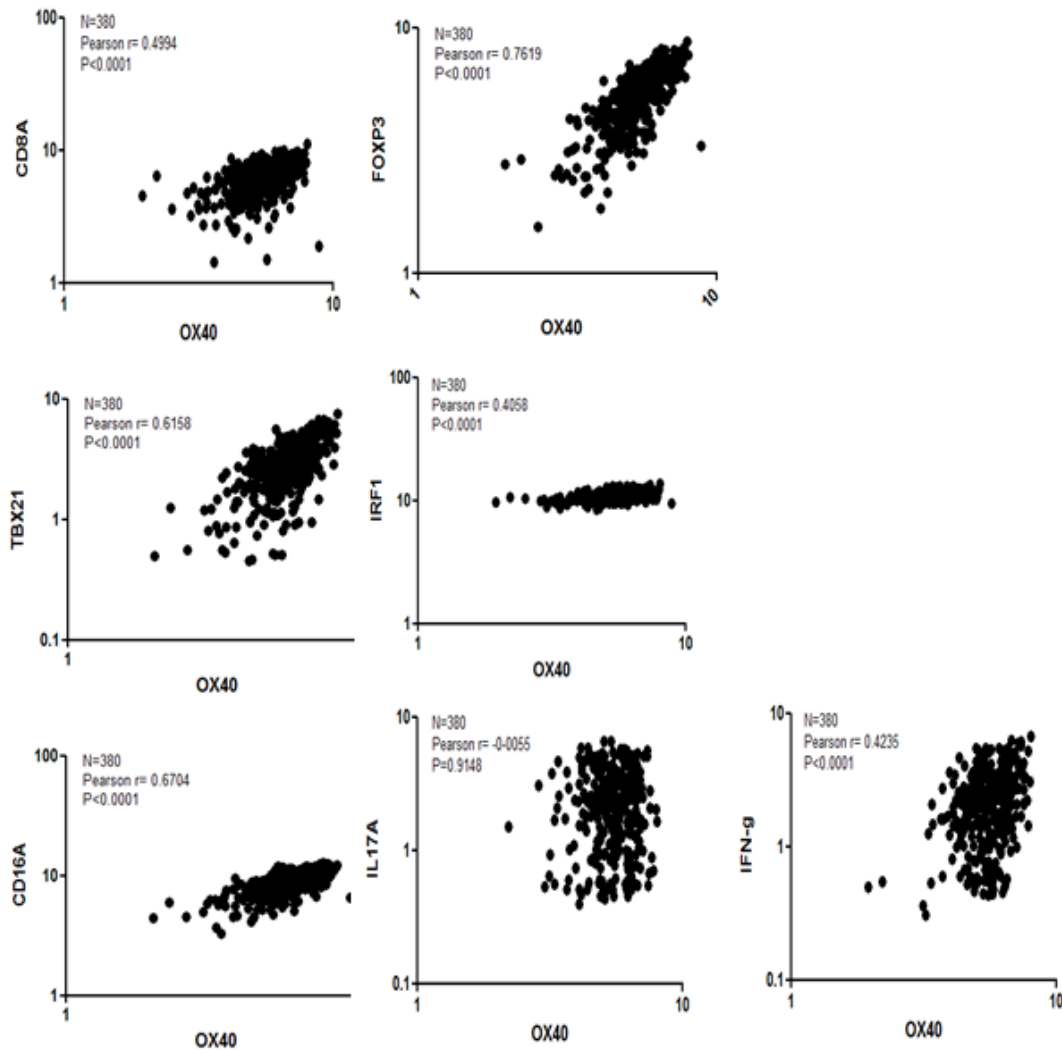

**Supplementary figure 1. CRC gene expression profiles from TCGA public database.** The expression of the indicated genes was evaluated by next generation sequencing (NGS) in 380 CRC specimens.

**Table 1s Comparison of clinical-pathological characteristics of the training and validation subsets (n=328 and n=329)\***

| Characteristics                   | Training          |              | Validation        |              | P                |
|-----------------------------------|-------------------|--------------|-------------------|--------------|------------------|
|                                   | N or median, mean | (% or range) | N or median, mean | (% or range) |                  |
| Age, years (median, mean)         | 70, 68.9          | (36-90)      | 72, 70.8          | (40-96)      | 0.041            |
| Tumor size in mm (median, mean)   | 50, 50.4          | (5-170)      | 50, 51.7          | (6-150)      | 0.593            |
| <b>Gender</b>                     |                   |              |                   |              | <b>0.326</b>     |
| Female (%)                        | 186               | (56.7)       | 173               | (52.6)       |                  |
| Male (%)                          | 142               | (43.3)       | 156               | (47.4)       |                  |
| <b>Anatomic site of the tumor</b> |                   |              |                   |              | <b>0.563</b>     |
| Left-sided (%)                    | 217               | (66.2)       | 208               | (63.2)       |                  |
| Right-sided (%)                   | 110               | (33.5)       | 118               | (35.9)       |                  |
| <b>T stage</b>                    |                   |              |                   |              | <b>0.452</b>     |
| T1 (%)                            | 16                | (4.8)        | 13                | (4.0)        |                  |
| T2 (%)                            | 55                | (16.8)       | 48                | (14.6)       |                  |
| T3 (%)                            | 208               | (63.4)       | 208               | (63.2)       |                  |
| T4 (%)                            | 39                | (11.9)       | 52                | (15.8)       |                  |
| <b>N stage</b>                    |                   |              |                   |              | <b>0.9324</b>    |
| N0 (%)                            | 165               | (50.3)       | 168               | (51.1)       |                  |
| N1 (%)                            | 86                | (26.2)       | 88                | (26.7)       |                  |
| N2 (%)                            | 61                | (18.6)       | 67                | (20.4)       |                  |
| <b>Tumor grade</b>                |                   |              |                   |              | <b>&lt;0.001</b> |
| G1 (%)                            | 8                 | (2.4)        | 7                 | (2.1)        |                  |
| G2 (%)                            | 277               | (84.5)       | 285               | (86.6)       |                  |
| G3 (%)                            | 3                 | (1.0)        | 30                | (9.1)        |                  |
| <b>UICC</b>                       |                   |              |                   |              | <b>0.053</b>     |
| Stage IA (%) T1N0                 | 12                | (3.6)        | 9                 | (2.7)        |                  |
| Stage IB (%) T2N0                 | 39                | (11.9)       | 34                | (10.3)       |                  |
| Stage IIA (%) T3N0                | 103               | (31.4)       | 99                | (30.1)       |                  |
| Stage IIB-C (%) T4N0              | 7                 | (2.1)        | 23                | (7.0)        |                  |
| Stage III (%) N+                  | 145               | (44.2)       | 151               | (45.9)       |                  |
| <b>Tumor border configuration</b> |                   |              |                   |              | <b>0.157</b>     |
| Infiltrative (%)                  | 216               | (65.9)       | 202               | (61.4)       |                  |
| Pushing (%)                       | 99                | (30.2)       | 119               | (36.2)       |                  |
| <b>Vascular invasion</b>          |                   |              |                   |              | <b>0.717</b>     |
| No (%)                            | 231               | (70.4)       | 231               | (70.2)       |                  |

|                                              |                 |                    |                 |                    |              |
|----------------------------------------------|-----------------|--------------------|-----------------|--------------------|--------------|
| <b>Yes (%)</b>                               | <b>84</b>       | <b>(25.6)</b>      | <b>91</b>       | <b>(27.7)</b>      |              |
| <b>Microsatellite Stability</b>              |                 |                    |                 |                    | <b>0.929</b> |
| <b>Proficient (%)</b>                        | <b>276</b>      | <b>(84.1)</b>      | <b>276</b>      | <b>(83.9)</b>      |              |
| <b>Deficient (%)</b>                         | <b>52</b>       | <b>(15.9)</b>      | <b>53</b>       | <b>(16.1)</b>      |              |
| <b>Localisation</b>                          |                 |                    |                 |                    | <b>0.379</b> |
| <b>Rectal cancers (%)</b>                    | <b>105</b>      | <b>(32.0)</b>      | <b>114</b>      | <b>(34.7)</b>      |              |
| <b>Rectosigmoid cancers (%)</b>              | <b>16</b>       | <b>(4.9)</b>       | <b>25</b>       | <b>(7.6)</b>       |              |
| <b>Median overall survival time (months)</b> | <b>91.5, 83</b> | <b>0-152</b>       | <b>93, 85.8</b> | <b>0-151</b>       | <b>0.469</b> |
| <b>5-year overall survival % (95%CI)</b>     | <b>58.9</b>     | <b>53.6 – 64.8</b> | <b>52.1</b>     | <b>46.7 – 58.0</b> | <b>0.071</b> |

\*Percentages may not add to 100% due to missing values of defined variables. Age and tumor size were evaluated using the Kruskal-Wallis test. Gender, anatomical site, T stage, N stage, grade, vascular invasion, and tumor border configuration were analyzed using the  $\chi^2$  test. Survival analysis was performed by using the Kaplan-Meier method.

**Supplementary table 2s. Association of OX40+ and CD8+ low and high density infiltration and clinical-pathological features in CRC**

|                                     |                                   | OX40 <sup>high</sup> /<br>CD8 <sup>high</sup> |               | OX40 <sup>low</sup> /<br>CD8 <sup>high</sup> |           | OX40 <sup>high</sup> /<br>CD8 <sup>low</sup> |           | OX40 <sup>low</sup> /<br>CD8 <sup>low</sup> |               | p-value        |
|-------------------------------------|-----------------------------------|-----------------------------------------------|---------------|----------------------------------------------|-----------|----------------------------------------------|-----------|---------------------------------------------|---------------|----------------|
|                                     |                                   | N=48                                          | (%)           | N=73                                         | (%)       | N=158                                        | (%)       | N=354                                       | (%)           |                |
| <b>Age</b>                          | years,<br>mean                    | 68 ± 10                                       |               | 70 ± 10                                      |           | 69 ± 11                                      |           | 71±11                                       |               | 0.10           |
| <b>Tumor diameter</b>               | mm,<br>mean ±<br>SD               | 56,7 ± 17,1                                   |               | 55,3 ± 29.2                                  |           | 47,7 ±23.1                                   |           | 51,5 ± 20.8                                 |               | 0.26           |
| <b>Gender</b>                       | Female<br>Male                    | 30<br>18                                      | 63<br>37      | 49<br>24                                     | 67<br>33  | 75<br>82                                     | 47<br>52  | 191<br>162                                  | 54<br>46      | 0.14           |
| <b>Tumor location</b>               | Left-<br>sided<br>Right-<br>sided | 32<br>15                                      | 63<br>31      | 35<br>38                                     | 48<br>52  | 112<br>45                                    | 71<br>28  | 225<br>125                                  | 64<br>35      | 0.007          |
| <b>Histologic subtype</b>           | Mucinous<br>Non-<br>mucinous      | 1<br>47                                       | 2<br>98       | 6<br>67                                      | 8<br>92   | 7<br>151                                     | 4<br>96   | 33<br>321                                   | 9<br>91       | 0.11           |
| <b>pT stage</b>                     | pT1-2<br>pT3-4                    | 12<br>33                                      | 25<br>69      | 22<br>48                                     | 30<br>66  | 43<br>108                                    | 27<br>68  | 47<br>300                                   | 13<br>85      | <b>0.00005</b> |
| <b>pN stage</b>                     | pN0<br>pN1-2                      | 32<br>14                                      | 67<br>29      | 46<br>27                                     | 63<br>37  | 93<br>58                                     | 59<br>37  | 151<br>190                                  | 43<br>54      | 0.00004        |
| <b>Tumour grade</b>                 | G1-2<br>G3                        | 39<br>6                                       | 81<br>13      | 59<br>10                                     | 81<br>14  | 141<br>11                                    | 89<br>7   | 314<br>31                                   | 89<br>9       | 0.29           |
| <b>Vascular invasion</b>            | Absent<br>Present                 | 35<br>10                                      | 73<br>21      | 52<br>17                                     | 71<br>23  | 120<br>31                                    | 76<br>21  | 234<br>112                                  | 66<br>32      | 0.034          |
| <b>Tumor border</b>                 | Pushing<br>Infiltrating           | 19<br>26                                      | 40<br>54      | 34<br>35                                     | 47<br>48  | 50<br>101                                    | 32<br>64  | 103<br>242                                  | 29<br>68      | 0.01           |
| <b>PTL inflammation</b>             | Absent<br>Present                 | 29<br>16                                      | 60<br>33      | 47<br>22                                     | 64<br>30  | 121<br>31                                    | 77<br>20  | 283<br>63                                   | 80<br>18      | 0.007          |
| <b>Microsatellite stability</b>     | Deficient<br>Proficient           | 10<br>38                                      | 21<br>79      | 14<br>59                                     | 19<br>81  | 17<br>140                                    | 11<br>89  | 60<br>293                                   | 17<br>83      | 0.189          |
| <b>5-year overall survival rate</b> | (95%CI)<br>nr. of<br>deaths       | 0.82                                          | 0.72-<br>0.94 | 0.60                                         | 0.49-0.73 | 0.59                                         | 0.53-0.68 | 0.48                                        | 0.43-<br>0.54 | <b>0.0001</b>  |

\*Percentages may not add to 100% due to missing values of defined variables. Variables are indicated as absolute numbers, %, median or range. Age and tumor size were evaluated using the Kruskal-Wallis test. Gender, anatomical site, T stage, N stage, grade, vascular invasion, and tumour border configuration were analyzed using the  $\chi^2$  test. Survival analysis was evaluated using the Kaplan-Meier method.
